# Supplementary material for: Ultrathin annealing-free polymer layers: new opportunity to enhance mobility and stability of low-voltage thin-film organic transistors
Source: Royal Society of Chemistry journal article supplement (doi:10.1039/c6ra09750b), 2016-01-01
Supplement: c6ra09750b1.pdf [file c6ra09750b1.pdf]

**Title:**

**Ultrathin Annealing-Free Polymer Layers: New Opportunity to Enhance Mobility and Stability of Low-Voltage Thin-Film Organic Transistors †**

**Authors:**

Deyang Ji <sup>a</sup>, Chengliang Wang, <sup>b</sup> Wenping Hu <sup>\*c</sup>, Harald Fuchs <sup>\*a</sup>

**Affiliations:**

<sup>a</sup> Center for Nanotechnology, Heisenbergstraße 11, 48149 Münster, Germany, Physikalisches Institut, Westfälische Wilhelms-Universität, Wilhelm-Klemm-Straße 10, 48149 Münster, Germany.

<sup>b</sup> Institute of Physics & IMN MacroNano®, Technical University of Ilmenau, Germany

<sup>c</sup> Beijing National Laboratory for Molecular Sciences, Key Laboratory of Organic Solids, Institute of Chemistry, Chinese Academy of Sciences, Beijing 100190, China.

† Electronic supplementary information (ESI) available.

Correspondence and requests for materials should be addressed to H. F. (fuchsh@uni-muenster.de) and W. H. (huwp@iccas.ac.cn).

## Supporting-1

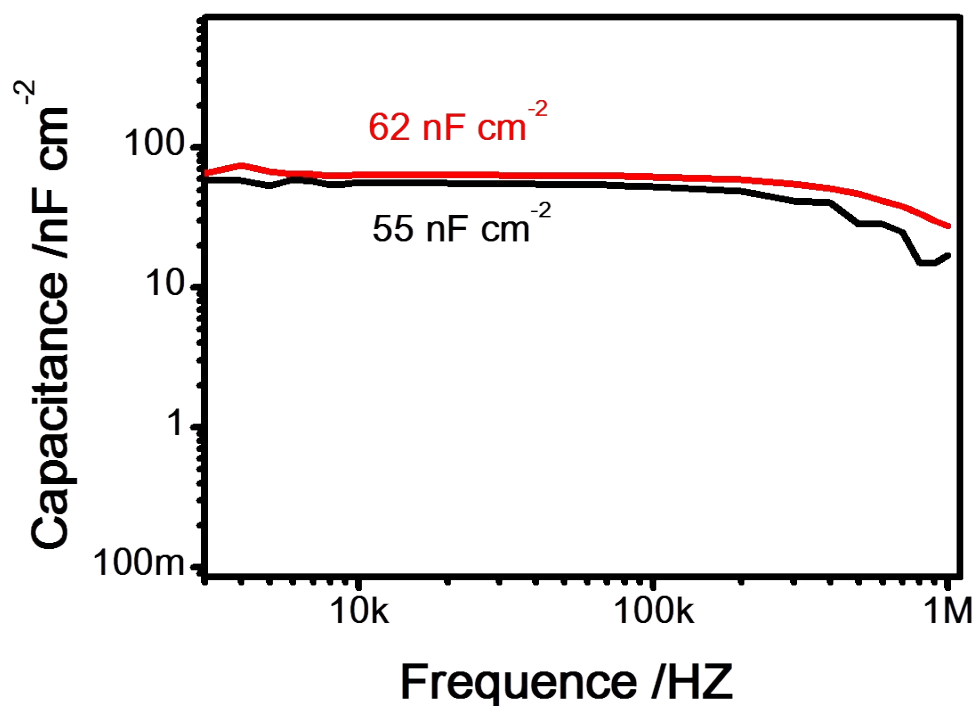

**Fig. S1** Frequency dependence of the specific capacitance (black line: PPDO/SiO<sub>2</sub>; red line: SiO<sub>2</sub>).

## Supporting-2

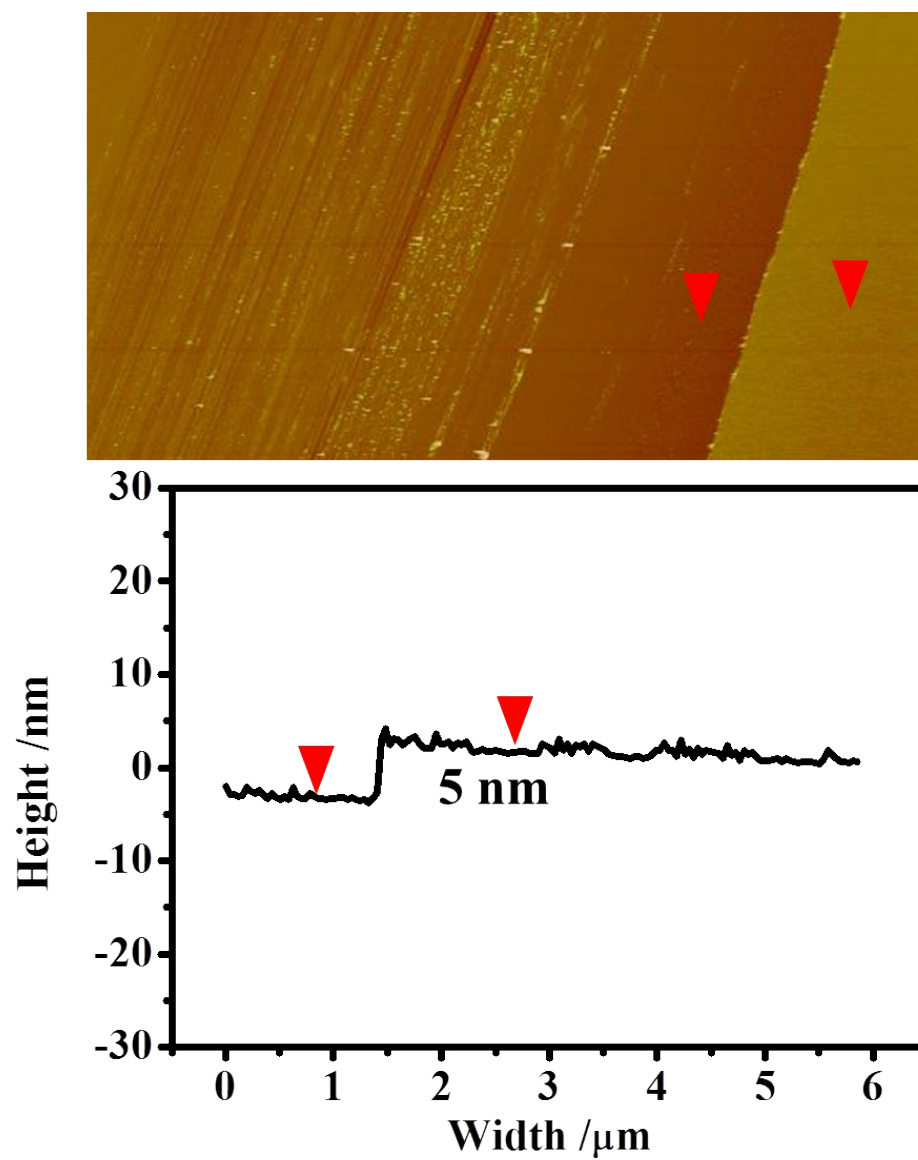

**Fig. S2** Thickness of the PPDO used in this work.

### Supporting-3

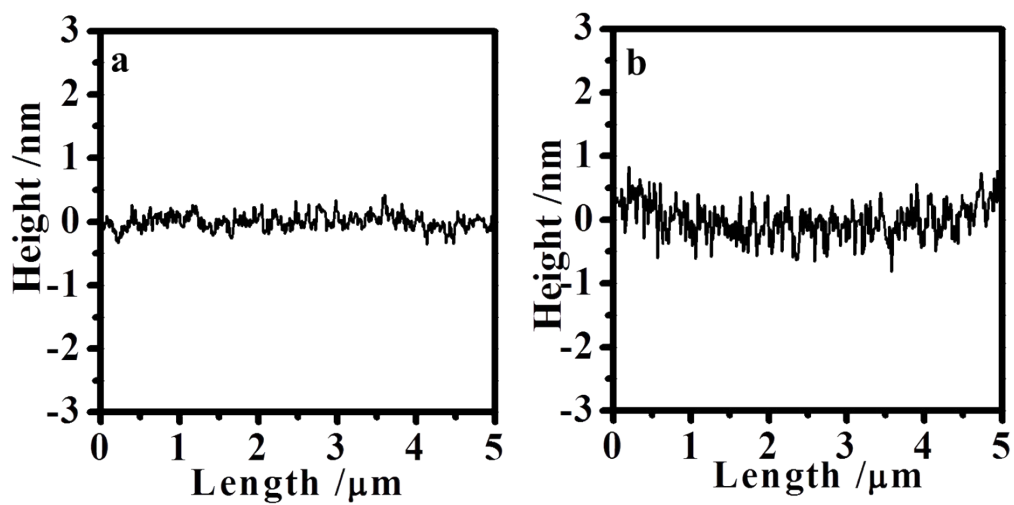

**Fig. S3** a) Roughness of the PPDO/ SiO<sub>2</sub> surface, b) The roughness of the SiO<sub>2</sub> surface.

Supporting-4

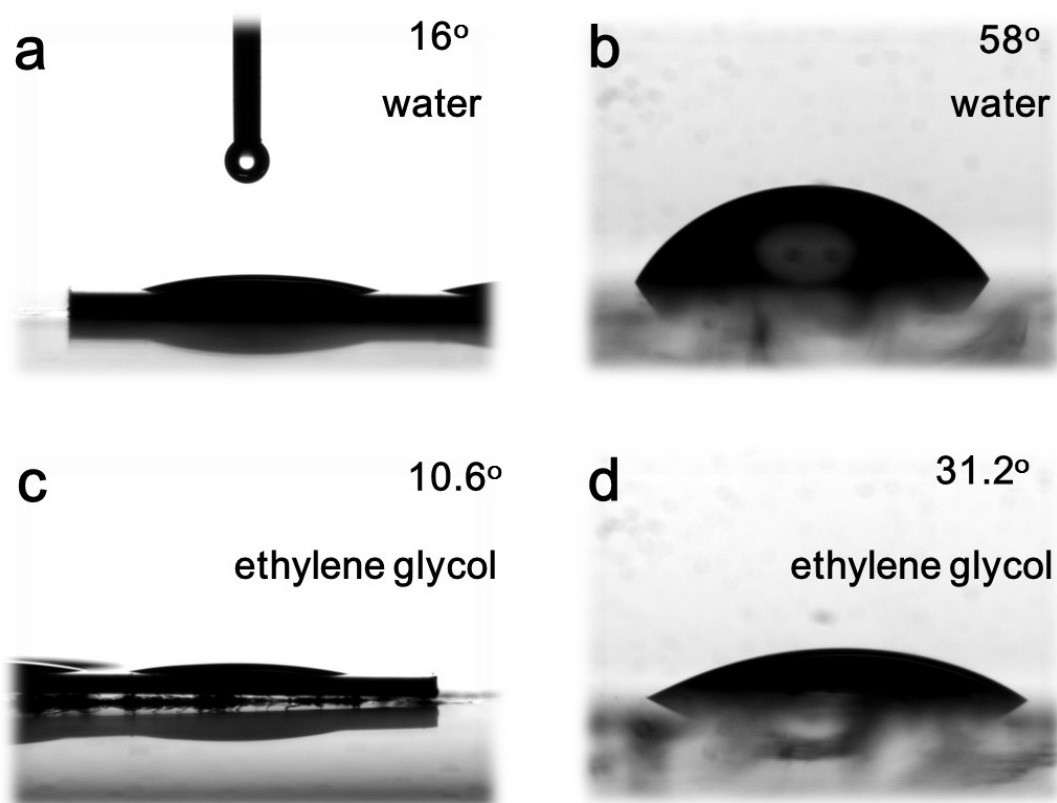

**Fig. S4** Contact angle of water on the surface of a) SiO<sub>2</sub>, and b) PPDO/ SiO<sub>2</sub>. The contact angle of ethylene glycol on the surface of c) SiO<sub>2</sub> and d) PPDO/ SiO<sub>2</sub>.

## Supporting-5

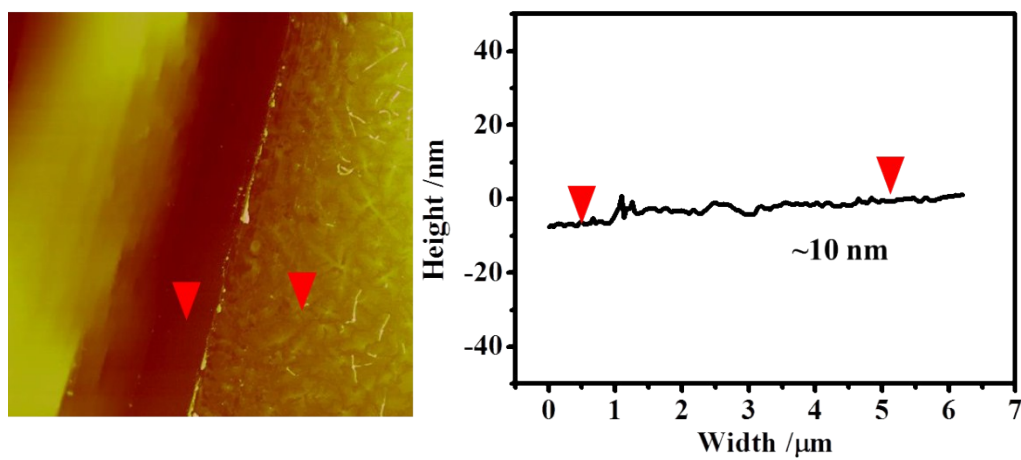

**Fig. S5** Thickness of the pentacene used in this work.

Supporting-6

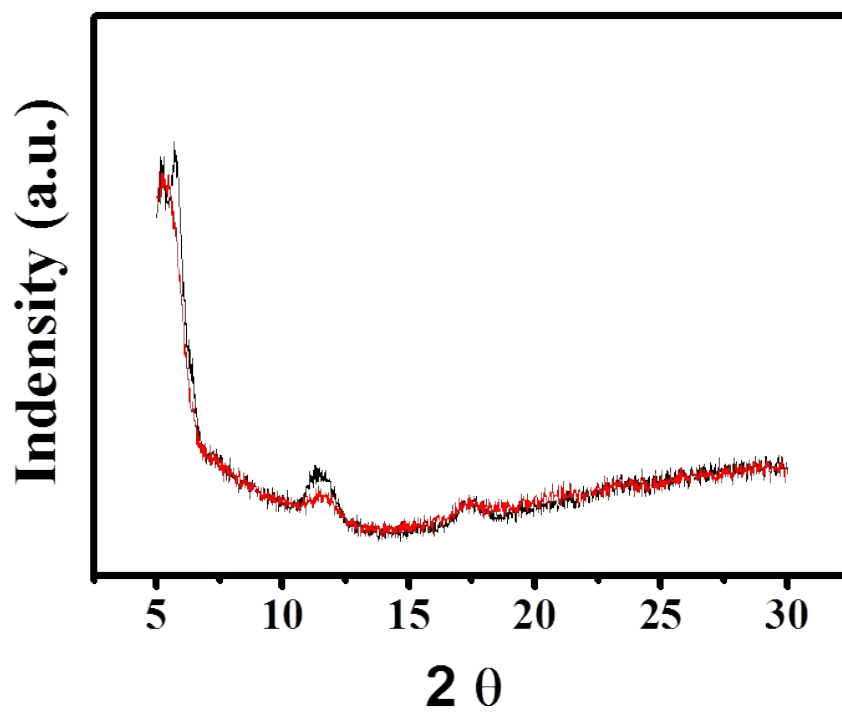

Fig. S6 XRD patterns of pentacene film grown on PPDO/SiO<sub>2</sub> (black line) and SiO<sub>2</sub> surface (red line)

## Supporting-7

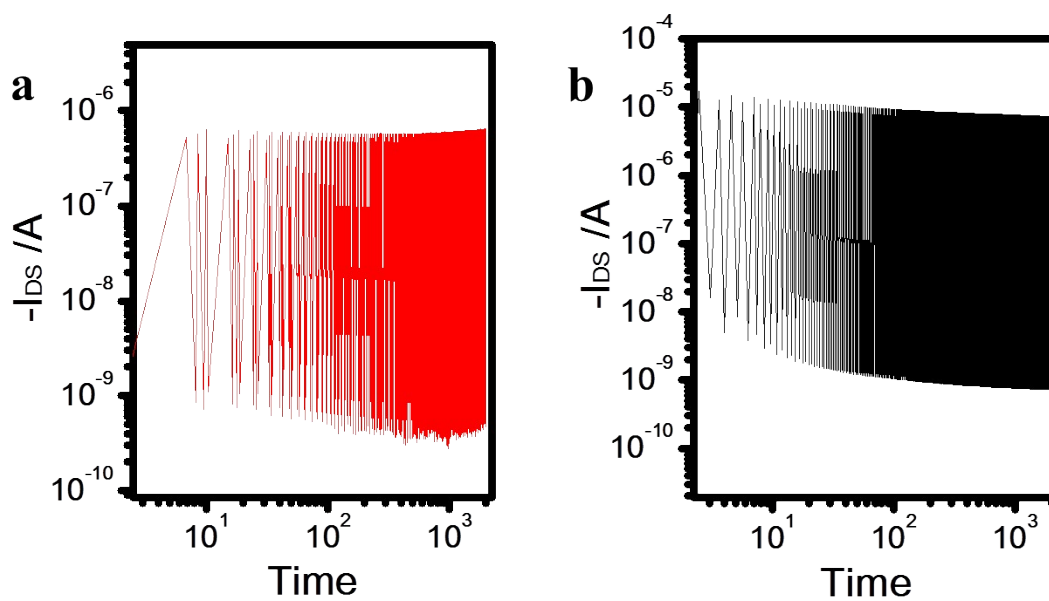

**Fig. S7** a) Switching cycles of drain current as a function of cycling time based on  $\text{SiO}_2$  insulator after 100 days, b) Switching cycles of drain current as a function of cycling time based on PPDO/ $\text{SiO}_2$  insulator after 100 days.
